# Supplementary material for: OSMI-1 Enhances TRAIL-Induced Apoptosis through ER Stress and NF-κB Signaling in Colon Cancer Cells
Source: MDPI journal article supplement (doi:10.3390/ijms222011073), 2021-10-14
Supplement: s1 [file s1]

## Supplementary

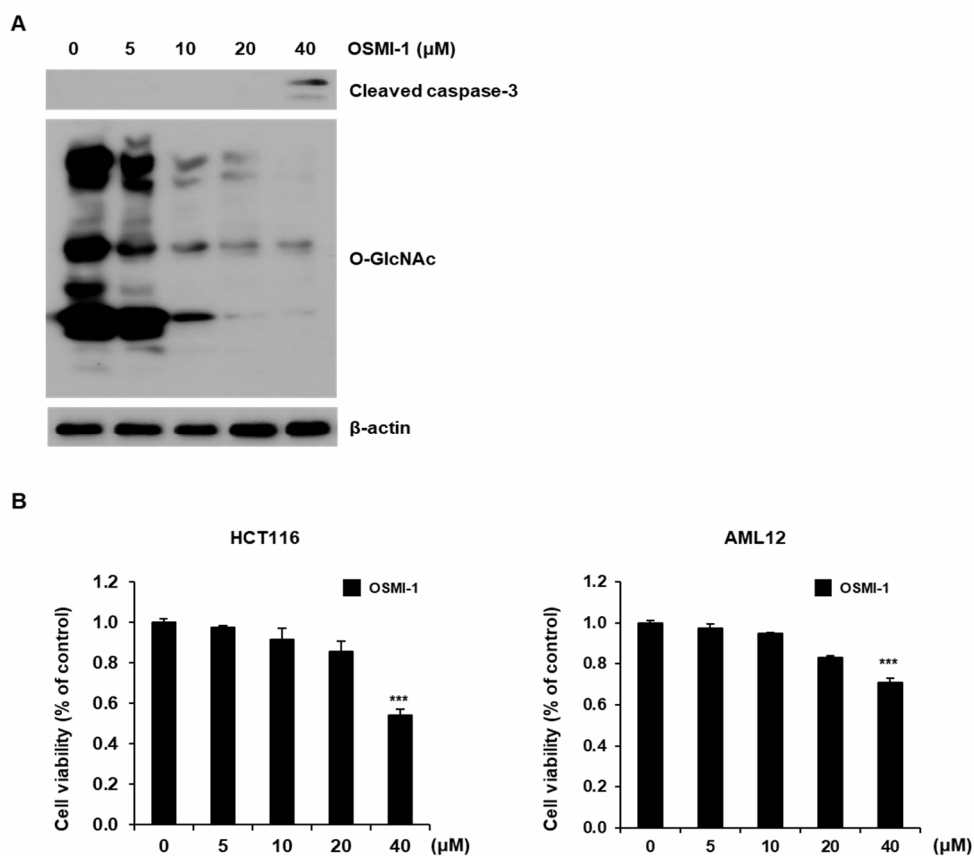

**Figure S1.** (A) In HCT116 was treated with various concentration of OSMI-1 (5–40 μM) for 24 h and western blot analysis was performed to detect levels of cleaved caspase-3 and O-GlcNAcylated protein. (B) HCT116 and AML12 cells were treated with of OSMI-1 (5–40 μM) for 24 h. Cell viability was analyzed by MTT assay. \*\*\* $p < 0.001$  compared with the control group.

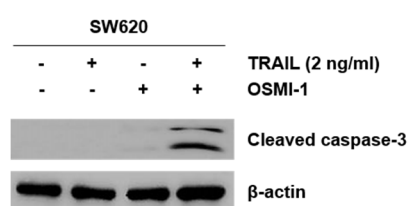

**Figure S2.** Combination of TRAIL and OSMI-1 modulates the levels of cleaved caspase-3. SW620 cells were treated with TRAIL (2 ng/ml) and/or OSMI-1 (20  $\mu$ M) for 24 h. The whole cell extracts were subjected to western blot analysis.

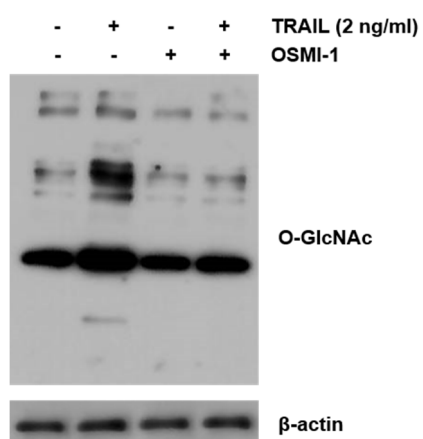

**Figure S3.** HCT116 tumors from xenograft mice were lysed for western blot analysis using antibodies against O-GlcNAc.
